# Supplementary material for: From commensalism to parasitism in Carapidae (Ophidiiformes): heterochronic modes of development?
Source: PeerJ journal article supplement (doi:10.7717/peerj.1786), 2016-03-10
Supplement: S2.pdf [file S2.pdf]

## Supplementary file S2

List and state of the different morphological characters. See Parmentier et al. (2002, 2010) for detailed information.

| <b>number</b> | <b>character</b>                                                                                         | <b>State</b> |
|---------------|----------------------------------------------------------------------------------------------------------|--------------|
| <b>1</b>      | Upper jaws not hidden by skin                                                                            | 0            |
|               | Upper jaws hidden by skin                                                                                | 1            |
| <b>2</b>      | ascending processes of the premaxilla missing                                                            | 0            |
|               | Not the case                                                                                             | 1            |
| <b>3</b>      | ascending and lateral processes of the premaxilla clearly distinct and V-shaped                          | 0            |
|               | ascending and lateral processes of the premaxilla parallel                                               | 1            |
| <b>4</b>      | No foramen on the premaxilla                                                                             | 0            |
|               | Foramen on the premaxilla                                                                                | 1            |
| <b>5</b>      | distal tip of the maxillary large and rounded                                                            | 0            |
|               | distal tip of the maxillary pointed                                                                      | 1            |
| <b>6</b>      | Ligament between maxilla and articulo-angular                                                            | 0            |
|               | Ligament absent                                                                                          | 1            |
| <b>7</b>      | No Connective fibers between maxilla and premaxilla                                                      | 0            |
|               | Connective fibers between maxilla and premaxilla                                                         | 1            |
| <b>8</b>      | Coronoid process = 25 to 30% of the mandible length                                                      | 0            |
|               | Coronoid process = 16 to 18% of the mandible length                                                      | 1            |
| <b>9</b>      | Lateral ethmoid with lateral branch (= U-shaped)                                                         | 0            |
|               | Lateral ethmoid without lateral branch                                                                   | 1            |
| <b>10</b>     | Suboperculum having a long dorsocaudal digitation                                                        | 0            |
|               | Suboperculum with numerous small caudal digitations                                                      | 1            |
| <b>11</b>     | Pharyngobranchial 2 larger than pharyngobranchial 4                                                      | 0            |
|               | Pharyngobranchial 2 smaller than or equal in size to pharyngobranchial 4                                 | 1            |
| <b>12</b>     | Cartilaginous interarcual element                                                                        | 0            |
|               | Bony interarcual element                                                                                 | 1            |
| <b>13</b>     | Site of articulation between interarcual element and epibranchial 1 high or midway on the epibranchial 1 | 0            |
|               | Site of articulation between interarcual element and epibranchial 1 very low on the epibranchial 1       | 1            |
| <b>14</b>     | Three well developed gill rakers on ceratobranchial 1                                                    | 0            |
|               | Three short gill rakers on ceratobranchial 1                                                             | 1            |
| <b>15*</b>    | Pleural ribs                                                                                             | 0            |
|               | No pleural ribs                                                                                          | 1            |
| <b>16</b>     | Swimbladder plate on third centrum not greatly expanded posteriorly                                      | 0            |
|               | Swimbladder plate on third centrum greatly expanded posteriorly, forming a uniform convex plate          | 1            |
| <b>17</b>     | External row of straight, conical teeth on premaxilla                                                    | 0            |
|               | No external row of straight, conical teeth on premaxilla                                                 | 1            |
| <b>18</b>     | No cardiform teeth on premaxilla                                                                         | 0            |
|               | Cardiform teeth on premaxilla                                                                            | 1            |
| <b>19</b>     | Small conical teeth on the posterior half of the premaxilla                                              | 0            |
|               | Lack of small conical teeth on the posterior half of the premaxilla                                      | 1            |
| <b>20</b>     | Conical teeth on the anterior half of the premaxilla                                                     | 0            |
|               | No conical teeth on the anterior half of the premaxilla                                                  | 1            |
| <b>21</b>     | No enlarged conical teeth at anterior end of the premaxilla                                              | 0            |
|               | Enlarged conical teeth at the anterior end of the premaxilla                                             | 1            |
| <b>22</b>     | Caniniform teeth (fangs) at distal tips of jaws                                                          | 1            |
|               | No caniniform teeth (fangs) at distal tips of jaws                                                       | 0            |
| <b>23</b>     | No diastema on upper and lower jaws                                                                      | 0            |
|               | Diastema on upper and lower jaws                                                                         | 1            |

|    |                                                                                   |   |
|----|-----------------------------------------------------------------------------------|---|
| 24 | No small teeth externally bordered by larger, inward-curving teeth on the dentary | 0 |
|    | Small teeth externally bordered by larger, inward-curving teeth on the dentary    | 1 |
| 25 | No uniserial row of big conical teeth on the dentary                              | 0 |
|    | Uniserial row of big conical teeth on the dentary                                 | 1 |
| 26 | No uniserial row of small conical teeth on the dentary                            | 0 |
|    | Uniserial row of small conical teeth on the dentary                               | 1 |
| 27 | No prominent tooth on vomer                                                       | 0 |
|    | Prominent tooth on vomer                                                          | 1 |
| 28 | Teeth on basibranchial 3                                                          | 0 |
|    | No teeth on basibranchial 3                                                       | 1 |
| 29 | No teeth on hypobranchial 3                                                       | 0 |
|    | Teeth on hypobranchial 3                                                          | 1 |
| 30 | No cardiform teeth on lower pharyngeal jaws                                       | 0 |
|    | Cardiform teeth on lower pharyngeal jaws                                          | 1 |
| 31 | Insertion of A1 $\beta$ on rostral-medial side of the maxillary                   | 0 |
|    | Insertion of A1 $\beta$ on rostral-dorsal side of the maxillary                   | 1 |
| 32 | Insertion of the adductor branchialis 5 on epibranchial 4                         | 0 |
|    | Insertion of the adductor branchialis 5 on epibranchials 3 and 4                  | 1 |
| 33 | Lack of four recti dorsales muscles                                               | 0 |
|    | Presence of four recti dorsales muscles                                           | 1 |
| 34 | Primary sonic muscles present                                                     | 0 |
|    | No primary sonic muscles                                                          | 1 |
| 35 | No central constriction at level of swim bladder                                  | 0 |
|    | Swim bladder central constriction                                                 | 1 |
| 36 | Rocker bone absent                                                                | 0 |
|    | Rocker bone present                                                               | 1 |
| 37 | Pectoral fins present                                                             | 0 |
|    | Pectoral fins absent                                                              | 1 |
| 38 | Scapula present                                                                   | 0 |
|    | Scapula absent                                                                    | 1 |
| 39 | Lateral ethmoid with three shelves                                                | 0 |
|    | Lateral ethmoid with two shelves                                                  | 1 |
| 40 | Palatine teeth straight                                                           | 0 |
|    | Palatine teeth curved anteriorly                                                  | 1 |
| 41 | No parallel tunic ridges on the swimbladder                                       | 0 |
|    | Parallel tunic ridges on the swimbladder                                          | 1 |
| 42 | Swimbladder without "tendon-hook" system                                          | 1 |
|    | Swimbladder with a "tendon-hook" system                                           | 0 |

\*Pleural ribs is used in the sense given by Markle 1989.
